# Supplementary figures and images for: New clathrates of Rb7.50(1)Tl0.50(1)Ge46and K7.62(1)Tl0.38(1)Ge45.34(3)
Source: Royal Society of Chemistry journal article supplement (doi:10.1039/c6ra14614g), 2016-01-01

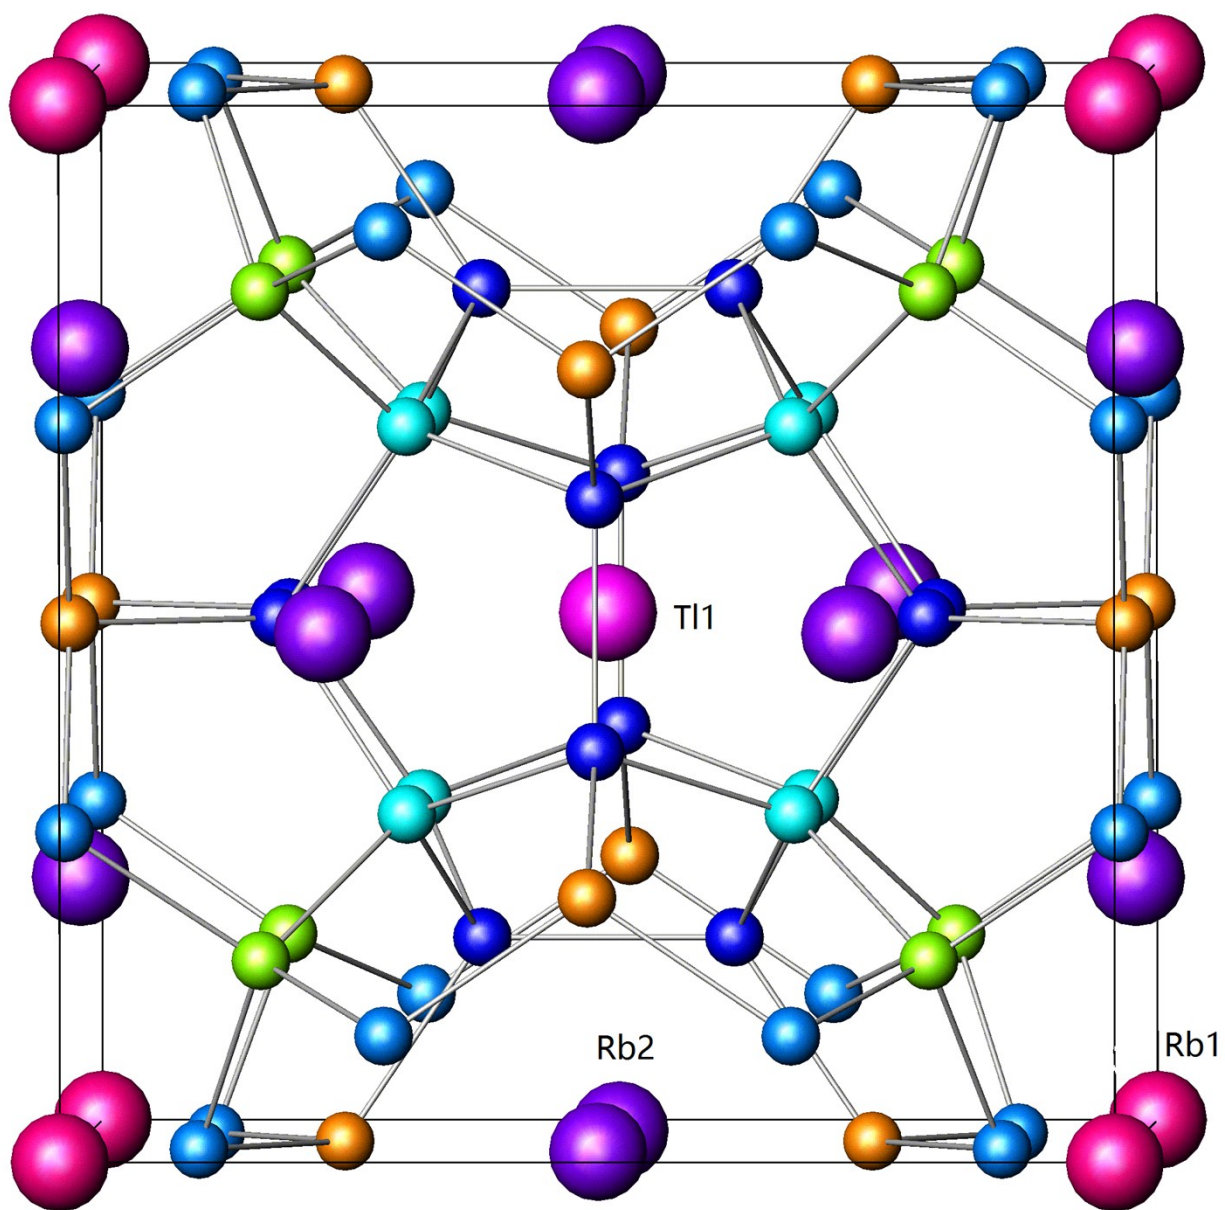

Figure S1

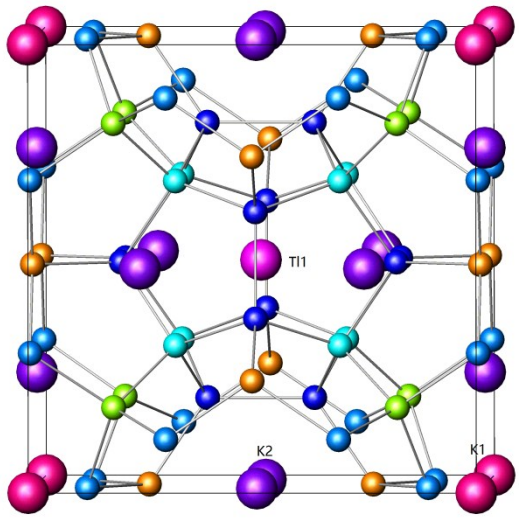

Figure S2

Supplement: c6ra14614g1.pdf [file c6ra14614g1.pdf]
